# Supplementary material
Source: PubMed Central journal article supplement (PMC5548439)

**A**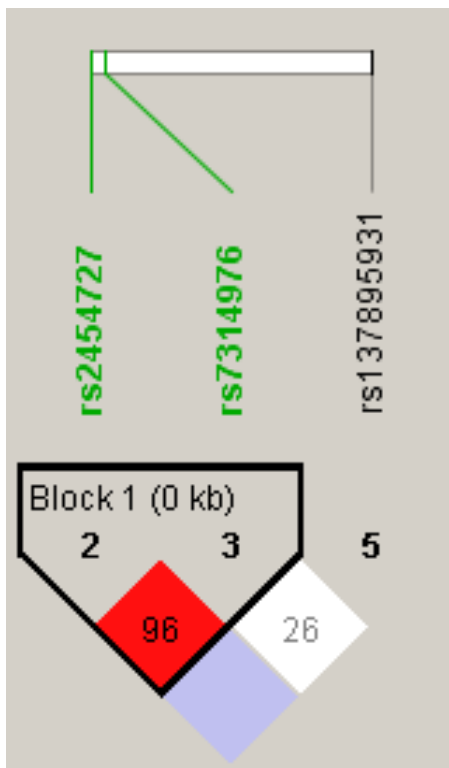**B**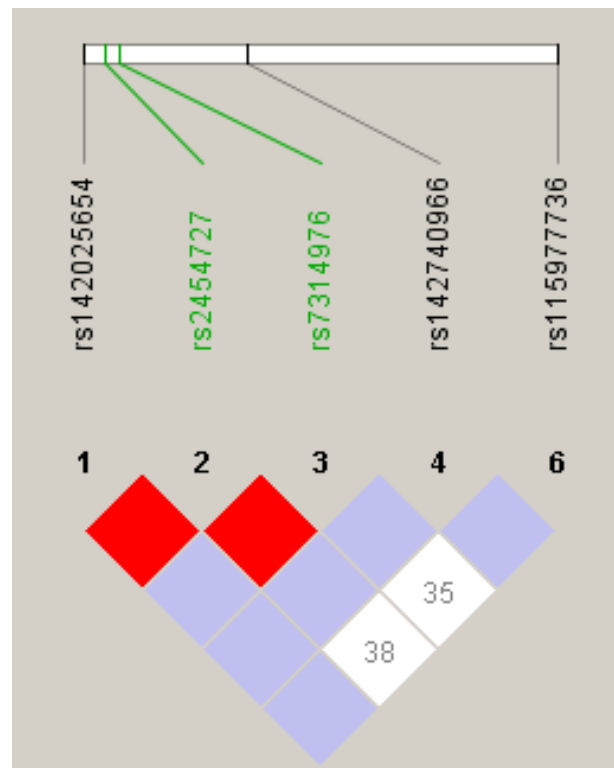

Supplement: NIHMS879782-supplement-Figure_S1.pdf [file NIHMS879782-supplement-Figure_S1.pdf]

### A. Statin + Placebo

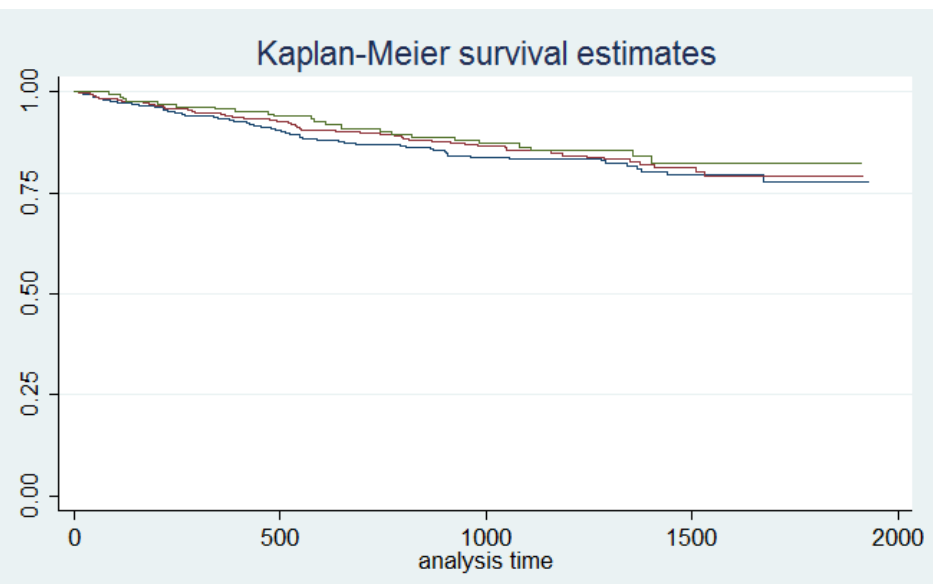

— 317 Met/Met

— 317 Met/Ile

— 317 Ile/Ile

### B. Statin + ER Niacin

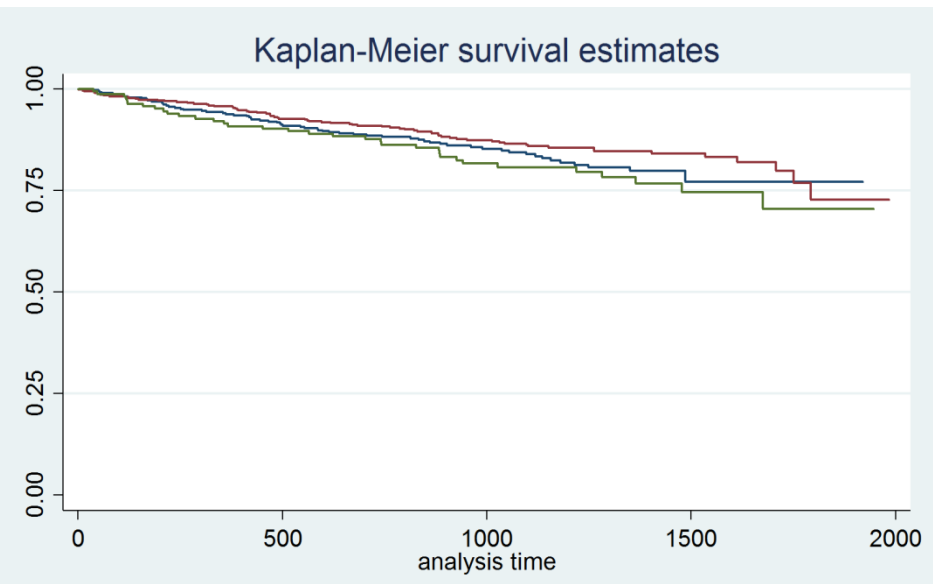

— 317 Met/Met

— 317 Met/Ile

— 317 Ile/Ile

Supplement: NIHMS879782-supplement-Figure_S2.pdf [file NIHMS879782-supplement-Figure_S2.pdf]
